# Supplementary material
Source: publisher figshare collection journal article supplement (https://tandf.figshare.com/articles/dataset/_/22276149)
Supplement: Supplementary file 1 [file 1]

Appendix А

COVID-19 questionnaire

| Questions | Answers | | | | |
| --- | --- | --- | --- | --- | --- |
| Did you have COVID-19 during the last 12 months? | yes | | | | |
|  | no | | | | |
| What symptoms of COVID-19 did you experience? |  | | | | |
| cough | yes | | | | |
| no | | | | |
| body temperature higher than 37C | yes | | | | |
| no | | | | |
| sore throat | yes | | | | |
| no | | | | |
| fatigue | yes | | | | |
| no | | | | |
| dyspnea | yes | | | | |
| no | | | | |
| rhinitis | yes | | | | |
| no | | | | |
| loss of smell or taste | yes | | | | |
| no | | | | |
| muscle ache | yes | | | | |
| no | | | | |
| diarrhea | yes | | | | |
| no | | | | |
| nausea, vomiting | yes | | | | |
| no | | | | |
| headache, dizziness | yes | | | | |
| no | | | | |
| rash | yes | | | | |
| no | | | | |
| loss of consciousness | yes | | | | |
| no | | | | |
| Which of the COVID-19 preventive measures have you followed during the pandemic? |  | | | | |
| self-isolation | yes | | | | |
| no | | | | |
| social distancing | yes | | | | |
| no | | | | |
| wearing facemasks in public settings or transport | yes | | | | |
| no | | | | |
| wearing gloves | yes | | | | |
| no | | | | |
| use of hand sanitizers | yes | | | | |
| no | | | | |
| What is your view on the effectiveness of the following COVID-19 preventive measures? Assess using the scale of 1 (not effective) to 5 (very effective) |  | | | | |
| self-isolation | 1 | 2 | 3 | 4 | 5 |
| social distancing | 1 | 2 | 3 | 4 | 5 |
| wearing facemasks in public settings or transport | 1 | 2 | 3 | 4 | 5 |
| wearing gloves | 1 | 2 | 3 | 4 | 5 |
| use of hand sanitizers | 1 | 2 | 3 | 4 | 5 |

COVID-19 опросник

| Вопросы | Ответы | | | | |
| --- | --- | --- | --- | --- | --- |
| В течение последних 12 месяцев Вы болели COVID-19? | да | | | | |
|  | нет | | | | |
| Какие признаки (симптомы) заболевания COVID-19 у Вас наблюдались? |  | | | | |
| кашель | да | | | | |
| нет | | | | |
| повышение температуры тела выше 370С | да | | | | |
| нет | | | | |
| неприятные ощущения или боль в горле | да | | | | |
| нет | | | | |
| быстрая утомляемость, слабость | да | | | | |
| нет | | | | |
| одышка | да | | | | |
| нет | | | | |
| насморк | да | | | | |
| нет | | | | |
| потеря обоняния или вкуса | да | | | | |
| нет | | | | |
| боль в мышцах | да | | | | |
| нет | | | | |
| диарея | да | | | | |
| нет | | | | |
| тошнота, рвота | да | | | | |
| нет | | | | |
| головная боль, головокружение | да | | | | |
| нет | | | | |
| сыпь | да | | | | |
| нет | | | | |
| потеря сознания | да | | | | |
| нет | | | | |
| Какие меры профилактики COVID-19 в период пандемии Вы соблюдали? |  | | | | |
| режим самоизоляции | да | | | | |
| нет | | | | |
| социальная дистанция | да | | | | |
| нет | | | | |
| медицинские маски в общественных местах или транспорте | да | | | | |
| нет | | | | |
| перчатки | да | | | | |
| нет | | | | |
| кожные антисептики | да | | | | |
| нет | | | | |
| По Вашему мнению, какова эффективность мер профилактики COVID-19 по шкале от 1 (наименее эффективные) до 5 (наиболее эффективные)? |  | | | | |
| режим самоизоляции | 1 | 2 | 3 | 4 | 5 |
| социальная дистанция | 1 | 2 | 3 | 4 | 5 |
| медицинские маски в общественных местах или транспорте | 1 | 2 | 3 | 4 | 5 |
| перчатки | 1 | 2 | 3 | 4 | 5 |
| кожные антисептики | 1 | 2 | 3 | 4 | 5 |
